# Supplementary material for: A 406-year non-growing-season precipitation reconstruction in the southeastern Tibetan Plateau
Source: Copernicus journal article supplement (doi:10.5194/cp-17-2381-2021), 2021-11-19
Supplement: Supplementary file [file cp-17-2381-2021-supplement-title-page.pdf › cp-17-2381-2021-supplement-title-page.pdf]

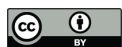

## *Supplement of*

# **A 406-year non-growing-season precipitation reconstruction in the southeastern Tibetan Plateau**

**Maierdang Keyimu et al.**

*Correspondence to:* Zongshan Li (zsli\_st@rcees.ac.cn)

- cp-17-2381-2021-supplement-title-page.pdf
- cp-2021-13-supplement
  - Supplementary file.docx
  - reconstructed series data.txt

The copyright of individual parts of the supplement might differ from the article licence.
